# Supplementary material for: Investigating the Role of Micromammals in the Ecology of Coxiella burnetii in Spain
Source: PubMed Central journal article supplement (PMC8000606; doi:10.3390/ani11030654), 2021-03-02

# RLB TARGETS

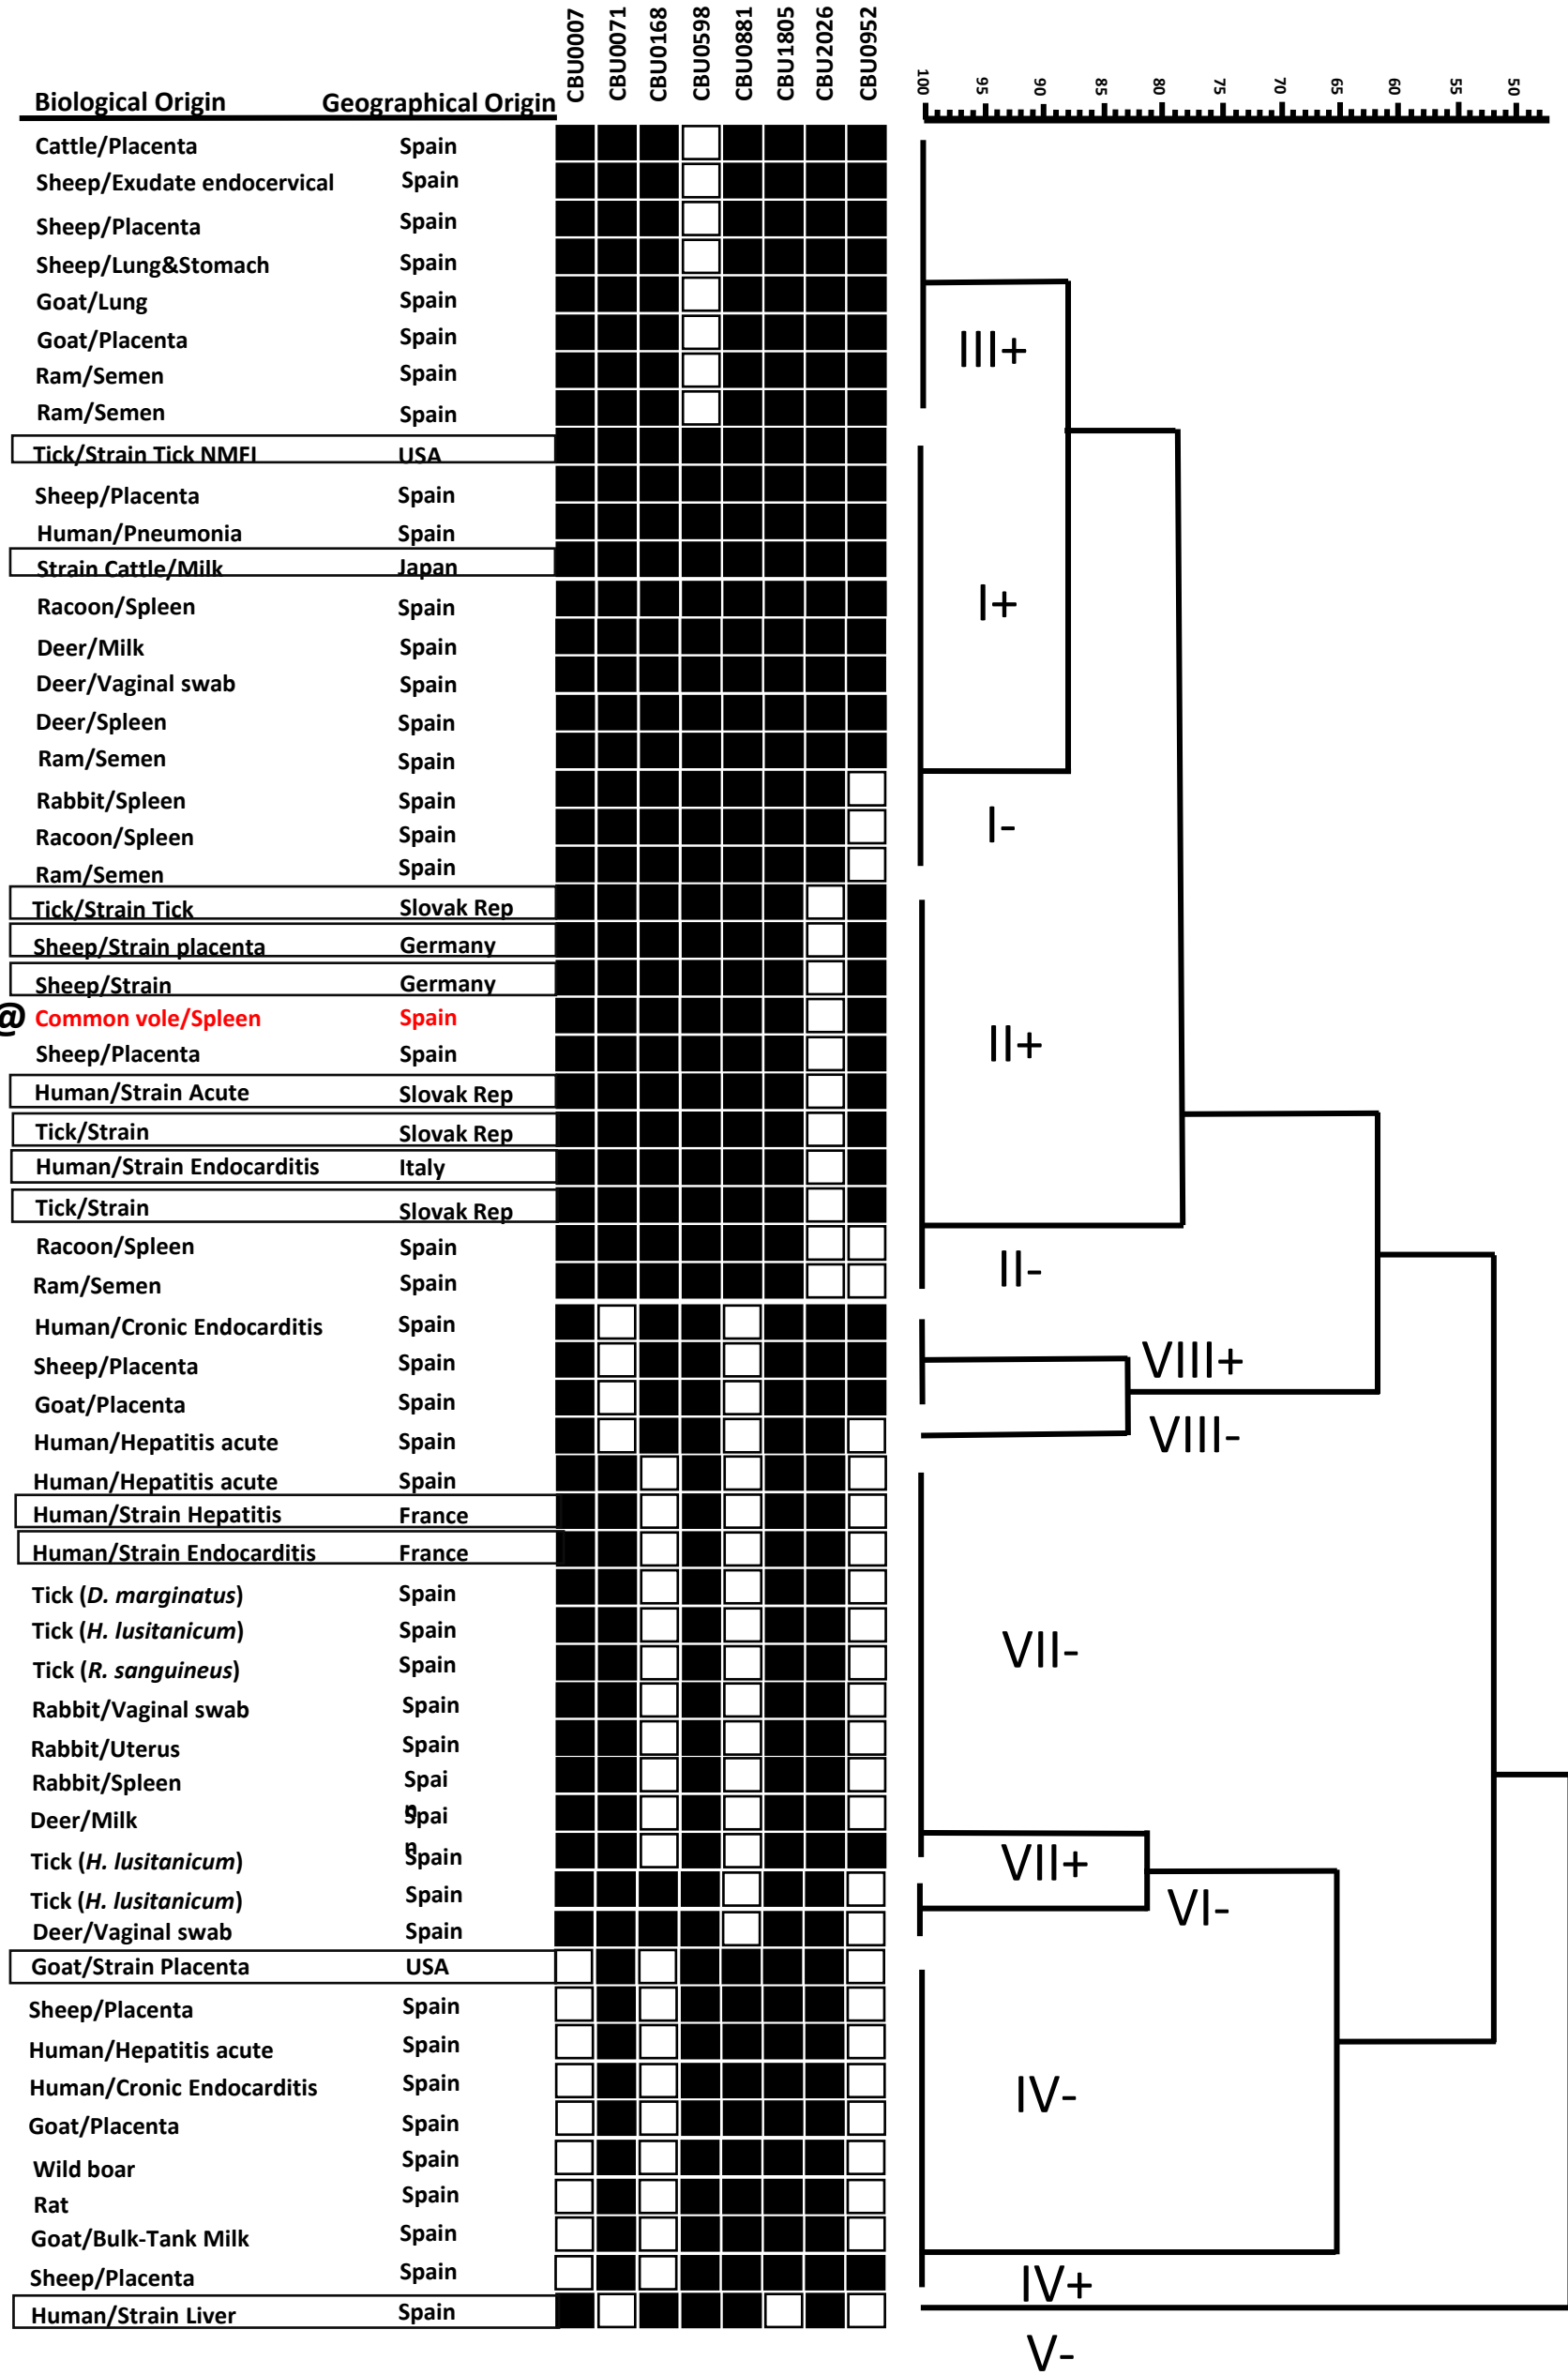

Supplement: animals-11-00654-s001.pdf [file animals-11-00654-s001.pdf]
